# Supplementary material
Source: Springer Nature journal article supplement (https://www.springermedizin.de/resource/supplementary/12958_2007_386_MOESM4_ESM.pdf/9567770)

**A**

Days

20

40

60

rK1  
↓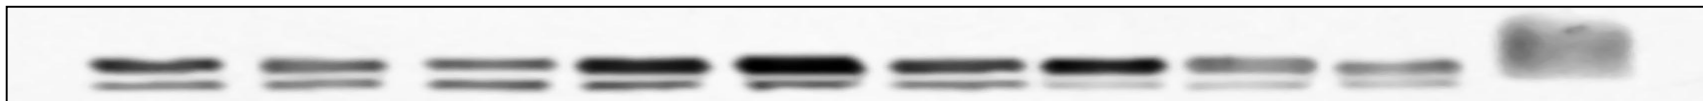**B**K1 expression  
(fold- 20 days)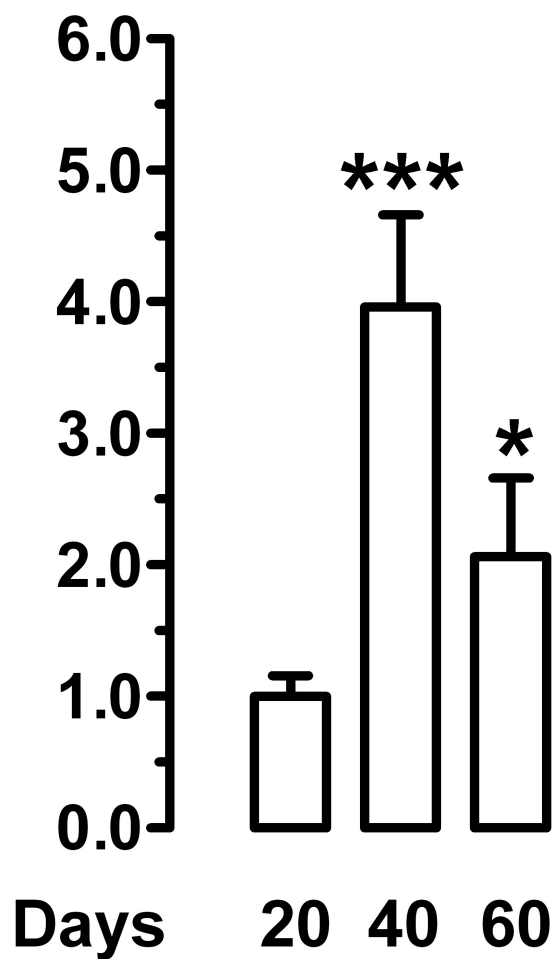

Supplement: MOESM4 [file 9567770]
